# Supplementary material
Source: Royal Society of Chemistry journal article supplement (doi:10.1039/d5nr03936c)
Supplement: d5nr03936c1.pdf [file d5nr03936c1.pdf]

**1 SUPPLEMENTAL FIGURES AND TABLES: A Novel Manganese Glycerophosphate Vaccine Gel**  
**2 Elicits Broad and Durable Immunity Across An Aged and Pox Virus Model**

3 *Md Jahirul Islam<sup>1</sup>, Luis Ontiveros-Padilla<sup>1</sup>, Stephen A. Ehrenzeller<sup>1</sup>, Denzel D. Middleton<sup>1</sup>, John A. Roque III<sup>1</sup>, Connor T.*  
4 *Murphy<sup>1</sup>, Nicole Rose Lukesh<sup>1</sup>, Dylan A. Hendy<sup>1</sup>, Erik S. Pena<sup>1,2</sup>, Ryan N. Stack<sup>3</sup>, William J. Polacheck<sup>3</sup>, Eric M. Bachelder<sup>1</sup>,*  
5 *Kristy M. Ainslie<sup>1,2,4\*</sup>*

6 <sup>1</sup>Division of Pharmacoengineering and Molecular Pharmaceutics, Eshelman School of Pharmacy, University of North  
7 Carolina at Chapel Hill, Chapel Hill, North Carolina, USA

8 <sup>2</sup>Joint Department of Biomedical Engineering, University of North Carolina at Chapel Hill and North Carolina State  
9 University, Chapel Hill, North Carolina, USA

10 <sup>3</sup>Lampe Joint Department of Biomedical Engineering, University of North Carolina at Chapel Hill and North Carolina State  
11 University, Chapel Hill, North Carolina, USA.

12 <sup>4</sup>Department of Microbiology & Immunology, UNC School of Medicine, University of North Carolina at Chapel Hill, Chapel  
13 Hill, North Carolina, USA.

14 <sup>^</sup> authors contributed equally

15 <sup>\*</sup>Corresponding author: [ainsliek@email.unc.edu](mailto:ainsliek@email.unc.edu)

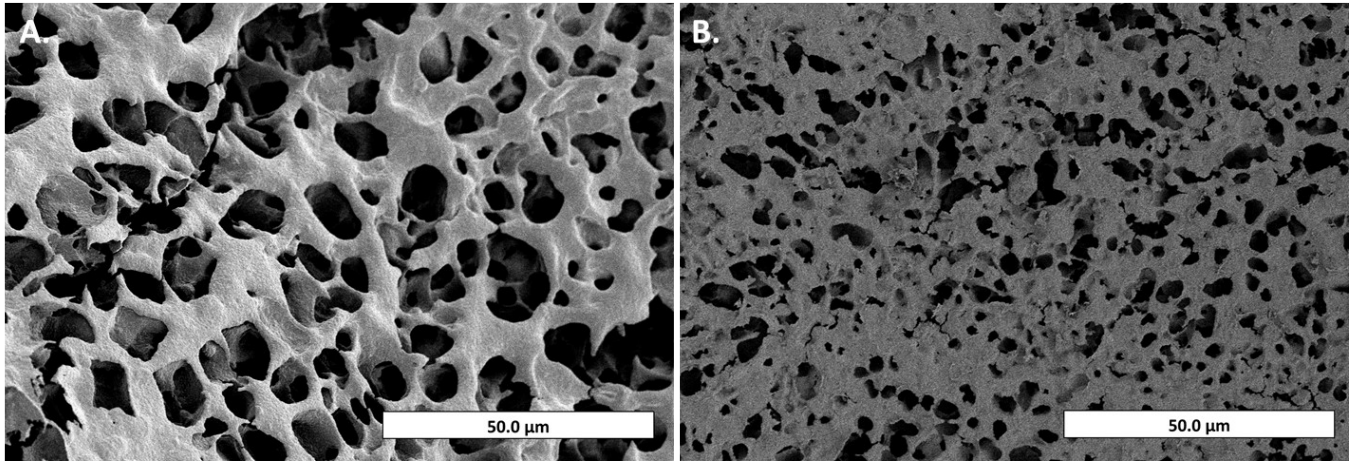

16

17 **Figure S1.** Comparison of MnGp gels fabricated with or without sucrose. SEMs of **(A)** 350 mg/mL MnGp with 150 mg/mL  
18 sucrose and **(B)** without sucrose.

19

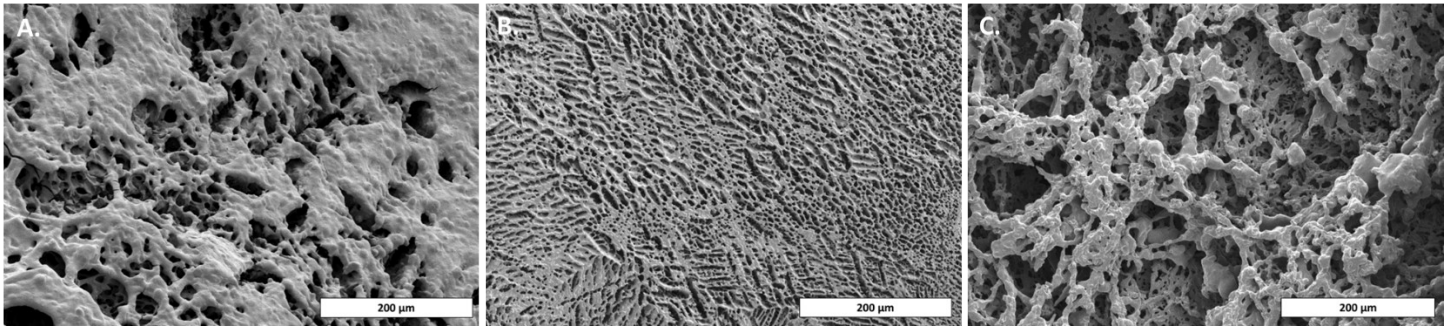

20

21 **Figure S2.** Comparison of MnGp gels at different concentrations. SEMs of **(A)** 250 mg/mL, **(B)** 100 mg/mL, and **(C)** 25  
22 mg/mL. No gel-like material was observed for the 5 mg/mL.

23

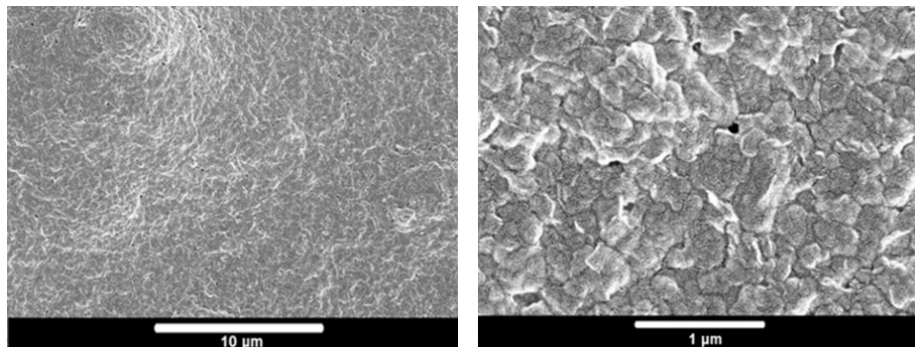

24

25 **Figure S3.** 250 mg/mL MnGp gel loaded with OVA.

A.

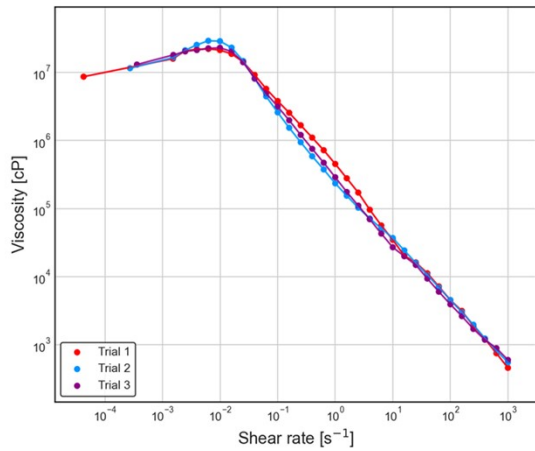

B.

| Reported Values           | Value   | Standard Deviation | Units                          |
|---------------------------|---------|--------------------|--------------------------------|
| Power Law Index ( $n$ )   | 0.0633  | 0.045              | dimensionless                  |
| Consistency Index ( $K$ ) | 325.185 | 74.288             | $\text{Pa}\cdot\text{s}^{(n)}$ |
| $R^2$                     | 0.998   |                    |                                |

26

27 **Figure S4. (A)** Viscosity of 250 mg/mL MnGp gel at different shear rates. **(B)** Shear thinning behavior of MnGp gel using  
 28 the Ostwald–de Waele power-law model.

29

30

31

A.

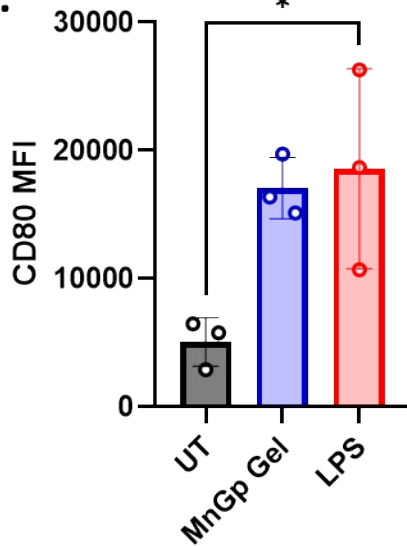

B.

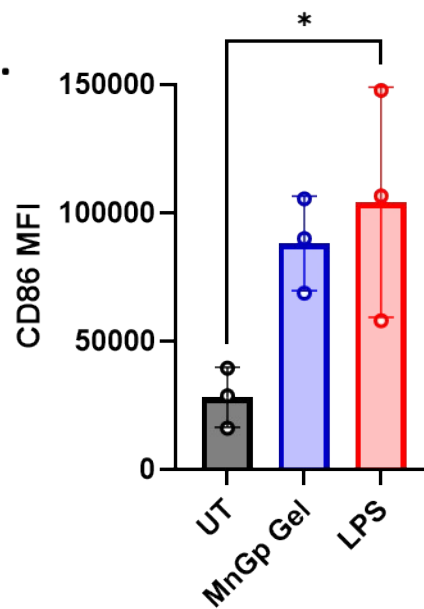

32

33 **Figure S5.** Enhanced co-stimulatory molecule expression in BMDCs in response to the MnGp gel. BMDCs were cultured  
 34 for 12 hours with media (UT), 100 mg/mL MnGp or 100 ng/mL LPS. MFIs of **(A)** CD80 and **(B)** CD86 were assessed via flow  
 35 cytometry. Data is presented as mean  $\pm$  standard deviation. Statistical significance is presented as  $*p < 0.05$  for an ordinary  
 36 one-way ANOVA with Tukey's multiple comparisons test.

37

38

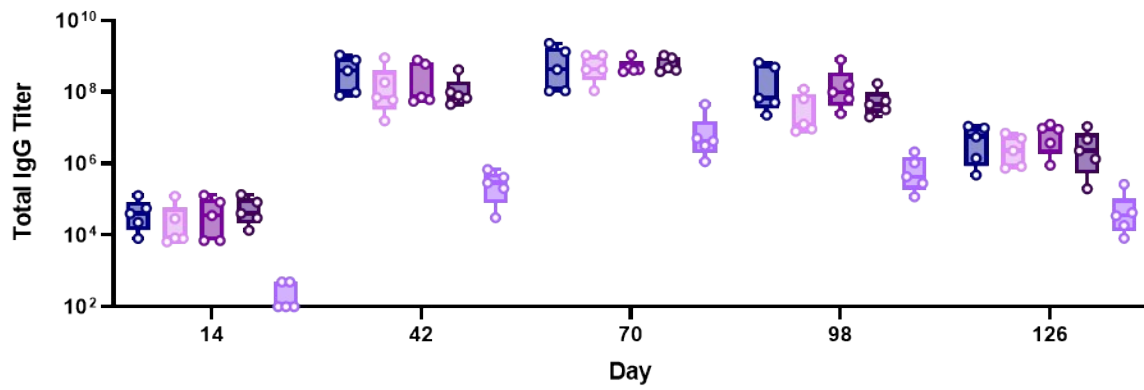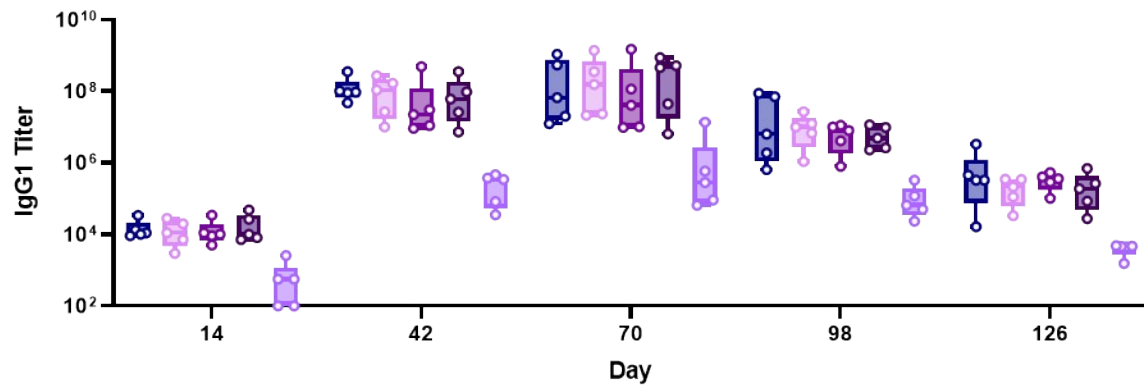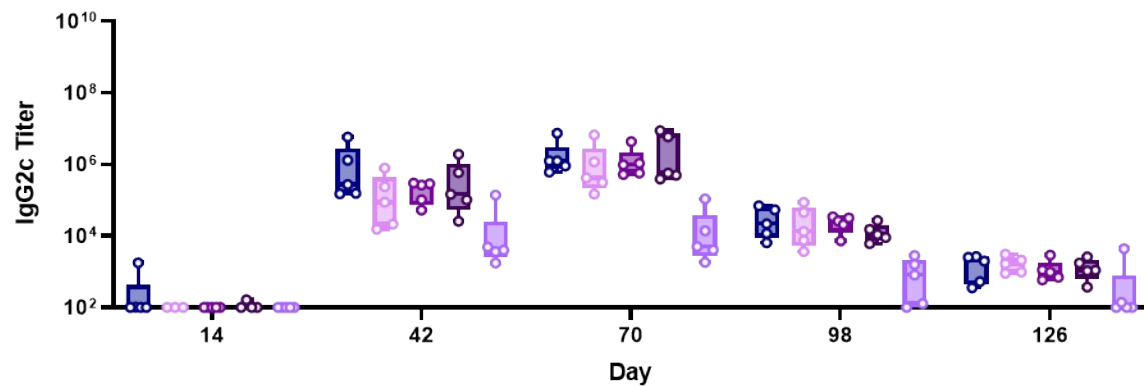

■ OVA + 250 mg/mL MnGp    ■ OVA + 250 mg/mL MnGp + 0.01  $\mu$ g cGAMP  
■ OVA + 250 mg/mL MnGp + 0.1  $\mu$ g cGAMP    ■ OVA + 250 mg/mL MnGp + 1  $\mu$ g cGAMP  
■ OVA + 1  $\mu$ g cGAMP

39

40 **Figure S6.** OVA-specific serum antibody titers following prime-boost immunization schedule. C57BL/6 mice (n = 5) were  
 41 immunized intramuscularly on days 0 and 28 with OVA + 250 mg/mL MnGp, OVA + 1  $\mu$ g cGAMP, OVA + 250 mg/mL MnGp  
 42 + 0.01  $\mu$ g cGAMP, OVA + 250 mg/mL MnGp + 0.1  $\mu$ g cGAMP, or OVA + 250 mg/mL MnGp + 1  $\mu$ g cGAMP. Sera were collected  
 43 at the indicated timepoints and assessed for OVA-specific (A) total IgG, (B) IgG1, and (C) IgG2c titers via ELISA. Data is  
 44 presented as median  $\pm$  range.

45

46

Flow gating strategy

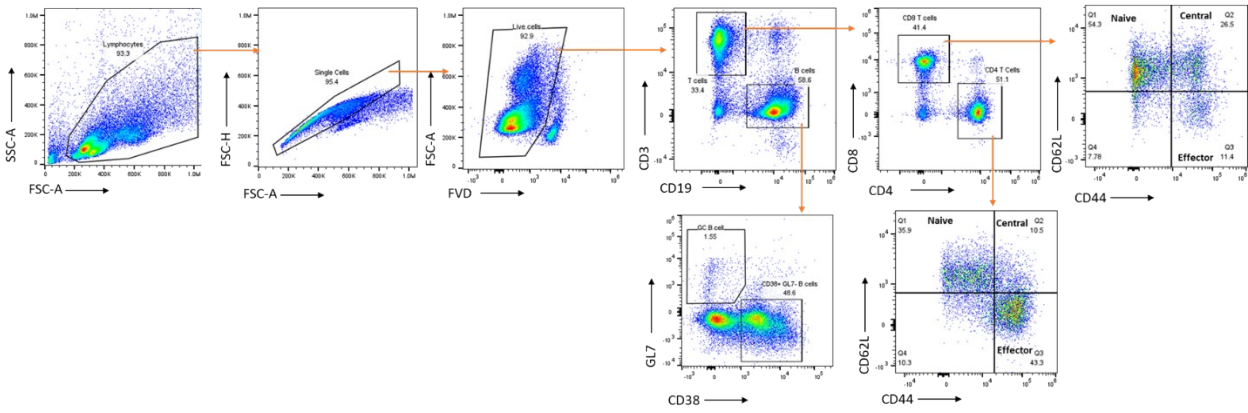

47

48 **Figure S7.** Flow cytometry gating strategy to characterize T and B cell phenotypes in the spleens and lymph nodes of  
 49 immunized mice. Example is shown from the spleen of a mouse immunized with OVA + 250 mg/mL MnGp.

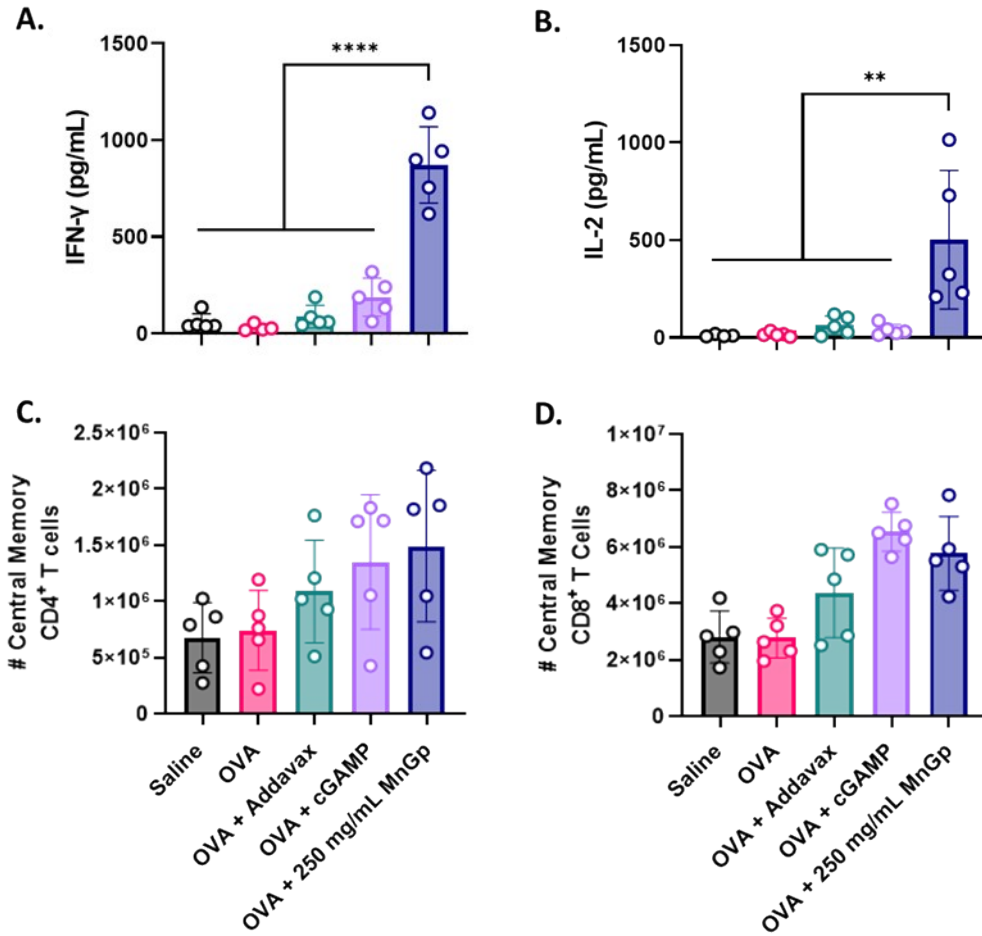

50

51 **Figure S8.** IFN- $\gamma$ , IL-2 production and counts of central memory T cell in spleens following a prime-boost-boost  
 52 immunization. C57BL/6 mice ( $n = 5$ ) were immunized intramuscularly on days 0, 28, and 140 with saline, unadjuvanted  
 53 OVA, OVA + Addavax, OVA + cGAMP, or OVA + 250 mg/mL MnGp. On day 151, splenocytes were collected and re-  
 54 stimulated with OVA to measure the release of (A) IFN- $\gamma$  and (B) IL-2. Splenocytes were stained to measure (C)  
 55 central memory CD4<sup>+</sup> T cells (CD4<sup>+</sup>CD44<sup>+</sup>CD62L<sup>+</sup>) and (D) central memory CD8<sup>+</sup> T cells (CD8<sup>+</sup>CD44<sup>+</sup>CD62L<sup>+</sup>). Data is presented as  
 56 mean  $\pm$  standard deviation. Statistical significance is presented as \*\* $p < 0.01$ , \*\*\*\* $p < 0.0001$  for an ordinary two-way  
 57 ANOVA with Tukey's multiple comparisons test.

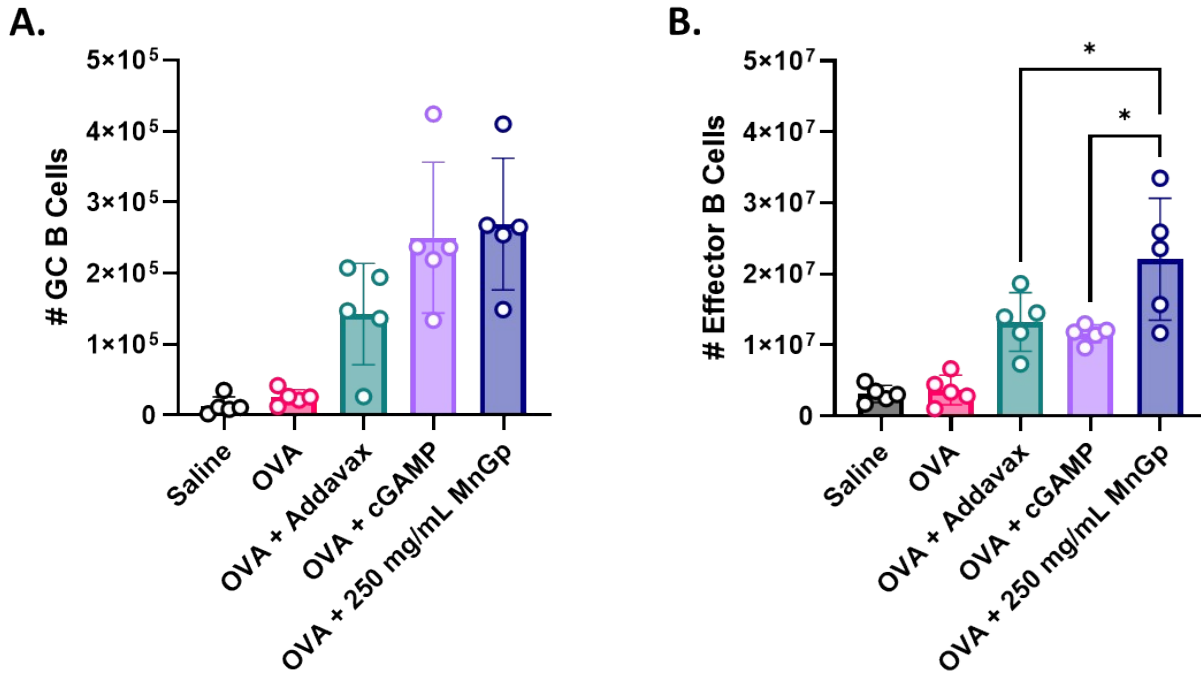

58

59 **Figure S9.** Counts of B cell phenotypes in the spleen following a prime-boost-boost immunization schedule. C57BL/6 mice  
 60 (n = 5) were immunized intramuscularly on days 0, 28, and 140 with saline, unadjuvanted OVA, OVA + Addavax, OVA +  
 61 cGAMP, or OVA + 250 mg/mL MnGp. On day 151, splenocytes were collected and stained to measure expansion of **(A)**  
 62 germinal center (GC) B cells (CD19<sup>+</sup>GL7<sup>+</sup>CD38<sup>-</sup>) and **(B)** effector B cells (CD19<sup>+</sup>GL7<sup>-</sup>CD38<sup>+</sup>). Data is presented as mean ±  
 63 standard deviation. Statistical significance is presented as \*p<0.05 for an ordinary two-way ANOVA with Tukey's multiple  
 64 comparisons test.

65

66

67

68

69

70

71

72

73

74

75

76

77

78

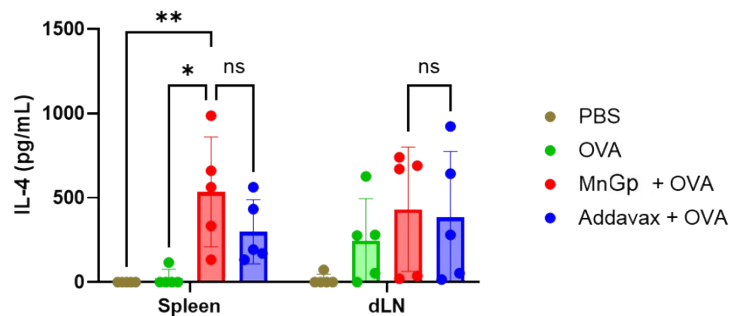

79

80 **Figure S10.** Spleen IL-4 production in aged mice immunized with MnGp. C57BL/6 18-month-old mice (n = 5) were  
 81 immunized intramuscularly on days 0, 28 and 77 with PBS, unadjuvanted OVA, MnGp (250 mg/mL) + OVA or Addavax +  
 82 OVA. IL-4 released from Splenocytes and dLN cells harvested on day 84 after a re-stimulation with OVA. Data is presented  
 83 as mean ± standard deviation. Statistical significance is presented as \*p<0.05 or \*\*p<0.01 for an ordinary two-way ANOVA  
 84 with Tukey's multiple comparisons test.

85

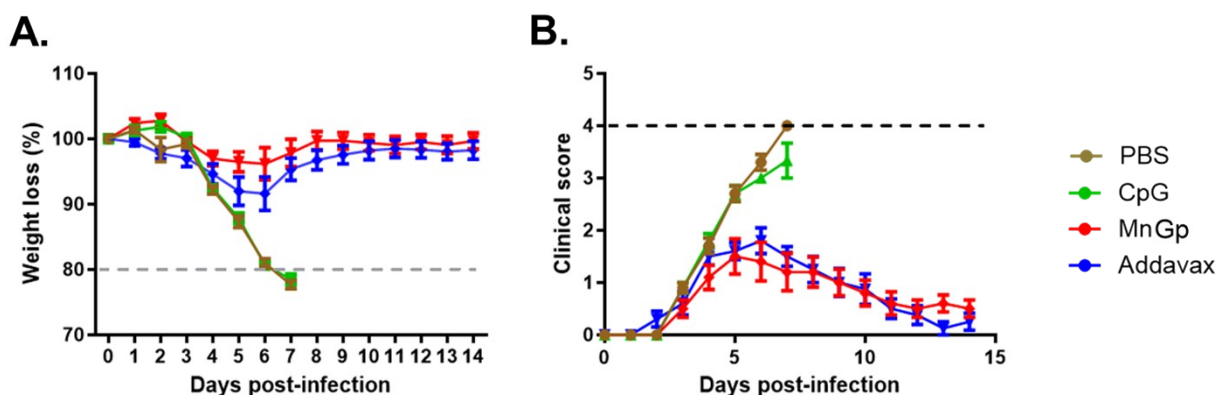

86

87 **Figure S11.** Weight loss and clinical score from mice immunized with MnGp + B5R and challenged with vaccinia virus.  
 88 BALB/c mice (n = 10) were immunized intramuscularly on days 0 and 28 with PBS, CpG + B5R, MnGp (250 mg/mL) + B5R  
 89 or Addavax + B5R. On day 56 the mice were challenged with vaccinia virus. **(A)** Weight loss of mice after challenge. **(B)**  
 90 Clinical score of mice after challenge. Data is presented as mean ± standard deviation. No statistical significance was found  
 91 for an ordinary two-way ANOVA with Tukey's multiple comparisons test.

92
